# Supplementary material
Source: Springer Nature journal article supplement (https://www.springermedizin.de/resource/supplementary/12888_2010_798_MOESM1_ESM.pdf/9478794)
Supplement: MOESM1 [file 9478794]

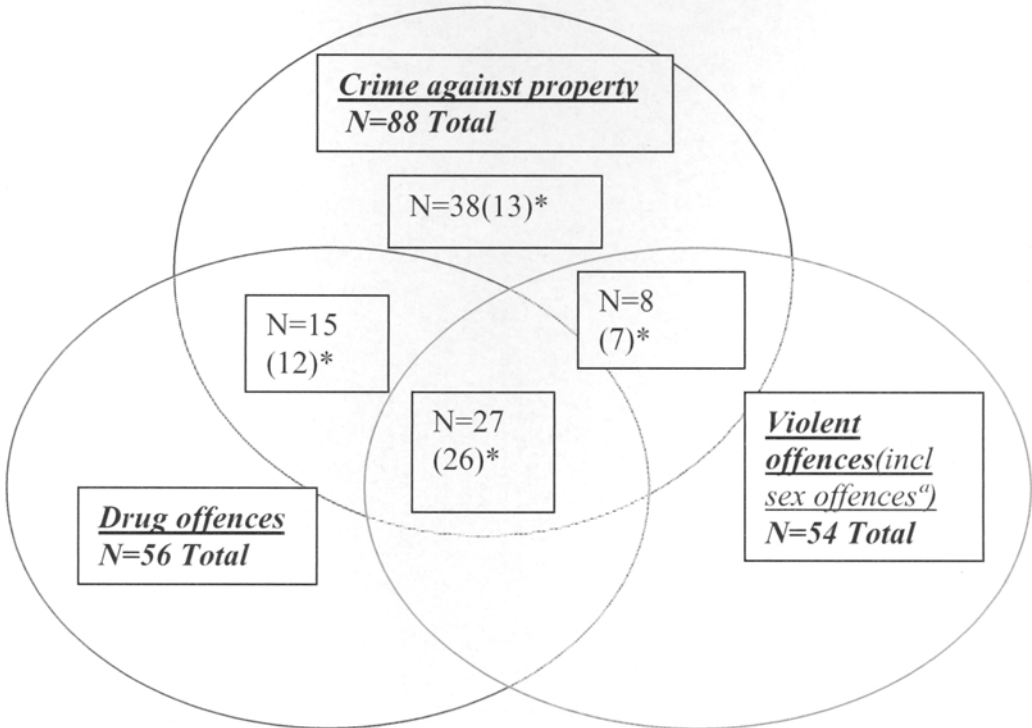

**Crime against property**

**N=88 Total**

**N=38(13)\***

**N=15  
(12)\***

**N=8  
(7)\***

**N=27  
(26)\***

**Drug offences**

**N=56 Total**

**Violent offences**  
*(incl sex offences<sup>a)</sup>)*

**N=54 Total**
